# Supplementary material
Source: publisher figshare collection journal article supplement (https://frontiersin.figshare.com/ndownloader/files/22146825)
Supplement: Supplementary file 1 [file 22146825]

## Sheet: KD_MSc_RawSurvey.csv
Iteration	Q2	Q3	Q4	Q5_1	Q5_2	Q5_3	Q5_4	Q6_1	Q6_2	Q6_3	Q6_4	Q6_5	Q7	Q8	Q9	Q9_5_TEXT	Q10	Q10_5_TEXT	Q11	Q12	Q13_1	Q13_2	Q14_1	Q14_2	Q14_3	Q14_4	Q15	Q16	Q17
	On a scale of 1 to 5, 1 being not at all and 5 being extremely, how knowledgeable are you about the deep sea?	There is no sunlight in the deep sea.	How sure of your answer are you?	On a scale of 1 to 5, 1 being strongly disagree and 5 being strongly agree, to what extent do you agree with the following statements? - The primary value of Oregon's deep sea is to provide for humans.	On a scale of 1 to 5, 1 being strongly disagree and 5 being strongly agree, to what extent do you agree with the following statements? - Commercial use of Oregon's deep sea is more important than protecting species that live there.	On a scale of 1 to 5, 1 being strongly disagree and 5 being strongly agree, to what extent do you agree with the following statements? - The needs of humans are more important than the needs of deep sea habitats.	On a scale of 1 to 5, 1 being strongly disagree and 5 being strongly agree, to what extent do you agree with the following statements? - Oregon's deep sea has value whether humans are present or not.	On a scale of 1 to 5, 1 being strongly disagree and 5 being strongly agree, to what extent do you agree with the following statements? - Oregon's deep sea should be protected for its own sake rather than to meet the needs of humans.	On a scale of 1 to 5, 1 being strongly disagree and 5 being strongly agree, to what extent do you agree with the following statements? - Commercial use of Oregon's deep sea should not be allowed if it damages habitats.	On a scale of 1 to 5, 1 being strongly disagree and 5 being strongly agree, to what extent do you agree with the following statements? - Oregon's deep sea should have rights similar to the rights of humans.	On a scale of 1 to 5, 1 being strongly disagree and 5 being strongly agree, to what extent do you agree with the following statements? - Humans benefit from processes in Oregon's deep sea.	On a scale of 1 to 5, 1 being strongly disagree and 5 being strongly agree, to what extent do you agree with the following statements? - Things that happen in Oregon's deep sea affect my life.	True or false: There is no life in the deep sea.	How sure of your answer are you?	Why is Oregon's deep sea important? Select all that apply - Selected Choice	Why is Oregon's deep sea important? Select all that apply - Other - Text	How can human's benefit from Oregon's deep sea? Select all that apply - Selected Choice	How can human's benefit from Oregon's deep sea? Select all that apply - Other - Text	Which habitats exist in Oregon's deep sea? Select all that apply	How sure of your answer are you?	On a scale of 1 to 5, 1 being strongly disagree and 5 being strongly agree, to what extent do you agree with the following statements? - It is important to me to learn more about the deep sea.	On a scale of 1 to 5, 1 being strongly disagree and 5 being strongly agree, to what extent do you agree with the following statements? - I am interested in learning more about the deep sea.	On a scale of 1 to 5, 1 being strongly disagree and 5 being strongly, to what extent are you interested in learning more about the following topics: - How processes in the deep sea benefit humans	On a scale of 1 to 5, 1 being strongly disagree and 5 being strongly, to what extent are you interested in learning more about the following topics: - The natural resources humans can use from the deep sea	On a scale of 1 to 5, 1 being strongly disagree and 5 being strongly, to what extent are you interested in learning more about the following topics: - Habitats in Oregon's deep sea	On a scale of 1 to 5, 1 being strongly disagree and 5 being strongly, to what extent are you interested in learning more about the following topics: - Animals in Oregon's deep sea	What is your home zipcode?	What is your age (in years)?	What is the highest degree or level of schooling you have completed? If currently enrolled, indicate highest degree received.
Baseline	3. Somewhat knowledgeable about the deep sea	TRUE	Extremely sure	4	2	2	5	3	2	3	5	5	FALSE	Extremely sure	Economic reasons,Environmental reasons,Cultural reasons		Fisheries,Energy,Medicine,Minerals		Methane seeps,Hydrothermal vents,Canyons	Extremely sure	5	5	5	5	5	5	97304	65	Bachelor's degree
Baseline	3. Somewhat knowledgeable about the deep sea	TRUE	Somewhat sure	1	1	1	1	5	5	5	5	5	FALSE	Extremely sure	Economic reasons,Environmental reasons,Cultural reasons		Fisheries,Energy,Medicine,Minerals		Cold water coral & sponge reefs,Methane seeps,Hydrothermal vents,Seamounts,Canyons,Kelp Forest,Mud	Somewhat sure	5	5	4	4	5	5	97405	36	Associates degree
Baseline	3. Somewhat knowledgeable about the deep sea	FALSE	Not sure	1	2	1	5	4	4	3	3	4	FALSE	Extremely sure	Environmental reasons		Medicine		Cold water coral & sponge reefs,Hydrothermal vents,Canyons	Somewhat sure	4	5	3	3	5	5	83868	56	Bachelor's degree
Baseline	2. Not very knowledgeable about the deep sea	TRUE	Somewhat sure	4	5	3	5	5	5	5	5	5	FALSE	Extremely sure	Environmental reasons		Fisheries		Cold water coral & sponge reefs	Extremely sure	5	5	5	5	5	5	97267	55	High school graduate, diploma or the equivalent (for example: GED)
Baseline	3. Somewhat knowledgeable about the deep sea	TRUE	Extremely sure	1	5	5	5	5	5	4	4	5	FALSE	Extremely sure	Environmental reasons,Other	Huge part of our ecosystem	Fisheries,Medicine,Minerals,Other	Things we are unaware of	Cold water coral & sponge reefs,Methane seeps,Hydrothermal vents,Seamounts,Canyons,Mud	Extremely sure	5	5	5	4	5	5	97267	56	High school graduate, diploma or the equivalent (for example: GED)
Baseline	2. Not very knowledgeable about the deep sea	TRUE	Somewhat sure	2	1	1	4	4	4	4	3	3	FALSE	Somewhat sure	Environmental reasons		Fisheries,Energy,Minerals		Cold water coral & sponge reefs	Not sure	3	4	3	3	4	4	97883	43	High school graduate, diploma or the equivalent (for example: GED)
Baseline	2. Not very knowledgeable about the deep sea	FALSE	Somewhat sure	2	2	2	1	4	4	4	4	4	FALSE	Extremely sure	Economic reasons,Environmental reasons,Cultural reasons		Fisheries,Energy,Medicine,Minerals		Cold water coral & sponge reefs,Methane seeps,Hydrothermal vents,Seamounts,Canyons,Kelp Forest,Mud	Not sure	4	4	4	4	4	4	97883	50	Bachelor's degree
Baseline	2. Not very knowledgeable about the deep sea	TRUE	Extremely sure	1	1	1	5	5	4	3	4	5	FALSE	Extremely sure	Economic reasons,Environmental reasons,Cultural reasons,Other	Humane	Fisheries,Medicine,Minerals		Cold water coral & sponge reefs,Hydrothermal vents,Seamounts,Canyons,Kelp Forest	Not sure	4	4	4	4	4	4	83709	70	Some college credit, no degree
Baseline	3. Somewhat knowledgeable about the deep sea	TRUE	Somewhat sure	3	2	2	5	4	4	4	4	4	FALSE	Extremely sure	Economic reasons,Environmental reasons		Fisheries,Energy,Medicine,Minerals		Hydrothermal vents,Canyons,Kelp Forest	Somewhat sure	3	4	4	4	4	4	97322	70	Bachelor's degree
Baseline	2. Not very knowledgeable about the deep sea	TRUE	Extremely sure	2	2	4	5	4	2	1	4	4	FALSE	Extremely sure	Economic reasons,Environmental reasons,Cultural reasons		Fisheries,Energy,Medicine,Minerals		Cold water coral & sponge reefs,Hydrothermal vents,Seamounts,Kelp Forest,Mud		3	3	3	3	3	3	97703	48	Master's degree
Baseline	2. Not very knowledgeable about the deep sea	TRUE	Not sure	2	3	4	4	3	3	2	3	3	FALSE	Somewhat sure	Economic reasons,Environmental reasons,Cultural reasons		Other		Methane seeps,Hydrothermal vents,Seamounts,Canyons	Not sure	4	4	4	4	3	4	97703	50	Bachelor's degree
Baseline	2. Not very knowledgeable about the deep sea	FALSE	Not sure	2	1	1	5	5	4	4	1	4	FALSE	Somewhat sure	Economic reasons,Environmental reasons		Fisheries,Medicine		Methane seeps,Hydrothermal vents,Seamounts	Not sure	1	1					19963	54	Some college credit, no degree
Baseline	1. Not at all knowledgeable about the deep sea	FALSE	Not sure	3	3	3	3	3	5	3	3	3	FALSE	Not sure	Environmental reasons		Minerals		Cold water coral & sponge reefs	Not sure	2	3	3	3	4	4	19904	22	Bachelor's degree
Baseline	3. Somewhat knowledgeable about the deep sea	FALSE	Somewhat sure	1	1	1	5	5	5	5	5	5	FALSE	Extremely sure	Environmental reasons,Cultural reasons		Fisheries,Medicine,Minerals		Cold water coral & sponge reefs,Methane seeps,Hydrothermal vents,Seamounts,Canyons,Kelp Forest,Mud	Not sure	5	5	5	2	5	5	49721	22	Bachelor's degree
Baseline	4. Very knowledgeable about the deep sea	FALSE	Somewhat sure	1	1	1	5	5	5	5	5	5	FALSE	Extremely sure	Environmental reasons,Cultural reasons		Fisheries,Energy,Medicine,Minerals		Cold water coral & sponge reefs,Methane seeps,Hydrothermal vents,Seamounts,Canyons,Mud	Somewhat sure	5	5	5	5	5	5	49721	25	Bachelor's degree
Baseline	2. Not very knowledgeable about the deep sea	TRUE	Somewhat sure	2	1	2	4	4	4	4	4	4	FALSE	Extremely sure	Environmental reasons				Canyons	Not sure	4	4	4	4	4	4	99224	76	Bachelor's degree
Baseline	3. Somewhat knowledgeable about the deep sea	TRUE	Somewhat sure	1	3	1	5	4	5	3	5	5	FALSE	Extremely sure	Economic reasons,Environmental reasons,Cultural reasons		Fisheries,Energy,Medicine,Minerals		Cold water coral & sponge reefs,Methane seeps,Hydrothermal vents,Canyons,Kelp Forest,Mud	Extremely sure	4	4	4	4	4	4	85283	72	Doctorate degree
Baseline	2. Not very knowledgeable about the deep sea	TRUE	Somewhat sure	3	2	2	4	4	4	4	4	4	FALSE	Extremely sure	Environmental reasons		Energy,Medicine,Minerals		Cold water coral & sponge reefs,Methane seeps,Hydrothermal vents,Canyons	Somewhat sure	4	4	5	5	5	5	99362	67	Associates degree
Baseline	3. Somewhat knowledgeable about the deep sea	TRUE	Somewhat sure	3	3	3	4	3	4	2	4	4	FALSE	Extremely sure	Economic reasons,Environmental reasons		Fisheries,Energy		Hydrothermal vents	Not sure	4	4	4	4	4	4	97525	46	Some college credit, no degree
Baseline	3. Somewhat knowledgeable about the deep sea	FALSE	Not sure	1	1	2	5	4	4	4	4	4	FALSE	Extremely sure	Economic reasons,Environmental reasons		Medicine		Hydrothermal vents,Kelp Forest	Not sure	5	5	4	4	4	4	97525	48	Some college credit, no degree
Baseline	3. Somewhat knowledgeable about the deep sea	TRUE	Somewhat sure	2	1	2	4	2	2	1	4	4	FALSE	Extremely sure	Other	Allo above	Other	All	Cold water coral & sponge reefs,Methane seeps,Hydrothermal vents,Canyons,Mud	Somewhat sure	4	4	4	4	4	4	95959	60	Some college credit, no degree
Baseline	2. Not very knowledgeable about the deep sea	FALSE	Somewhat sure	3	2	2	4	3	4	3	4	4	FALSE	Extremely sure	Economic reasons,Environmental reasons,Cultural reasons		Fisheries,Energy,Medicine,Minerals		Cold water coral & sponge reefs,Methane seeps,Canyons,Kelp Forest	Somewhat sure	4	4	4	4	4	4	95959	64	Some college credit, no degree
Baseline	3. Somewhat knowledgeable about the deep sea	FALSE	Somewhat sure	2	1	1	4	4	3	4	4	2	FALSE	Somewhat sure	Economic reasons,Environmental reasons,Cultural reasons		Fisheries,Minerals		Cold water coral & sponge reefs,Kelp Forest	Somewhat sure	4	4	4	4	4	4	98513	27	High school graduate, diploma or the equivalent (for example: GED)
Baseline	2. Not very knowledgeable about the deep sea	FALSE	Somewhat sure	3	1	2	5	4	5	5	5	4	FALSE	Extremely sure	Economic reasons,Environmental reasons,Cultural reasons		Fisheries,Energy,Medicine,Minerals		Cold water coral & sponge reefs,Hydrothermal vents,Canyons,Kelp Forest,Mud	Somewhat sure	5	5	5	5	5	5	98513	27	Some college credit, no degree
Baseline	3. Somewhat knowledgeable about the deep sea	FALSE	Somewhat sure	4	2	2	4	4	4	4	4	4	FALSE	Extremely sure	Other	All of the above			Cold water coral & sponge reefs,Methane seeps,Hydrothermal vents,Seamounts,Canyons,Kelp Forest,Mud	Extremely sure	4	5	5	5	5	5	97385	61	High school graduate, diploma or the equivalent (for example: GED)
Baseline	3. Somewhat knowledgeable about the deep sea	FALSE	Somewhat sure				5	4					FALSE	Extremely sure	Environmental reasons		Fisheries,Energy,Medicine,Minerals		Cold water coral & sponge reefs,Methane seeps,Hydrothermal vents,Seamounts,Canyons,Kelp Forest	Extremely sure	5	5	5	5	5	5	97333	56	Doctorate degree
Baseline	2. Not very knowledgeable about the deep sea	TRUE	Somewhat sure	2	1	2	4	4	4	3	3	3	FALSE	Somewhat sure	Economic reasons,Environmental reasons,Cultural reasons		Energy,Medicine,Minerals		Methane seeps,Hydrothermal vents,Canyons	Not sure	2	3	4	4	4	4	97213	36	Master's degree
Baseline	2. Not very knowledgeable about the deep sea	TRUE	Somewhat sure	3	3	3	4	3	4	3	4	4	FALSE	Extremely sure	Economic reasons,Environmental reasons,Other	Too much still unknown. Probably has more far reaching value than what is currently known	Fisheries,Energy,Medicine,Minerals		Cold water coral & sponge reefs,Methane seeps,Hydrothermal vents,Seamounts,Canyons,Kelp Forest,Mud	Somewhat sure	4	4	4	5	4	4	97213	33	Bachelor's degree
Baseline	3. Somewhat knowledgeable about the deep sea	FALSE	Somewhat sure	4	2	3	4	4	4		5	4	FALSE	Extremely sure	Economic reasons,Environmental reasons,Cultural reasons		Fisheries,Energy,Minerals		Cold water coral & sponge reefs,Seamounts,Kelp Forest,Mud	Somewhat sure	4	4	4	5	5	5	97013	53	Professional degree
Baseline	3. Somewhat knowledgeable about the deep sea	TRUE	Extremely sure	2	2	2	5	2	1	4	5	5	FALSE	Extremely sure	Environmental reasons		Fisheries,Medicine		Methane seeps,Hydrothermal vents,Seamounts,Canyons	Somewhat sure	4	4	4	4	4	4	97304	55	Some college credit, no degree
Baseline	3. Somewhat knowledgeable about the deep sea	TRUE	Somewhat sure	1	1	1	5	5	5	5	5	5	FALSE	Extremely sure	Economic reasons,Environmental reasons,Cultural reasons		Fisheries,Energy,Medicine,Minerals		Methane seeps,Hydrothermal vents,Canyons,Kelp Forest	Somewhat sure	4	5	5	5	5	5	97225	27	Bachelor's degree
Baseline	3. Somewhat knowledgeable about the deep sea	TRUE	Not sure	1	1	3	5	5	5	3	4	1	FALSE	Extremely sure	Environmental reasons,Cultural reasons						3	4	3	3	3	3	97225	30	Associates degree
Baseline	2. Not very knowledgeable about the deep sea	FALSE	Not sure	2	1	2	4	5	5	4	4	4	FALSE	Somewhat sure	Economic reasons,Environmental reasons,Cultural reasons		Fisheries,Energy		Cold water coral & sponge reefs,Methane seeps,Hydrothermal vents,Seamounts,Canyons,Kelp Forest,Mud	Not sure	3	4	4	4	4	4	97304	19	Some college credit, no degree
Baseline	3. Somewhat knowledgeable about the deep sea	TRUE	Extremely sure	3	3	4	5	4	4	3	4	4	FALSE	Extremely sure	Environmental reasons		Minerals		Cold water coral & sponge reefs,Methane seeps,Hydrothermal vents,Seamounts,Canyons,Kelp Forest,Mud	Somewhat sure	4	4	4	4	4	4	97302	20	Some college credit, no degree
Baseline	2. Not very knowledgeable about the deep sea	TRUE	Somewhat sure	1	1	1	5	5	5	5	5	5	FALSE	Somewhat sure	Economic reasons,Environmental reasons,Cultural reasons		Medicine,Minerals		Hydrothermal vents,Seamounts,Canyons,Kelp Forest	Not sure	5	5	4	4	5	5	92104	67	Doctorate degree
Baseline	3. Somewhat knowledgeable about the deep sea	TRUE	Somewhat sure	1	1	1	5	4	5	5	5	5	FALSE	Extremely sure	Environmental reasons		Humans cannot benefit from Oregon's deep sea.		Methane seeps,Hydrothermal vents,Seamounts,Canyons	Extremely sure	4	4	4	4	4	4	92104	59	Master's degree
Baseline	3. Somewhat knowledgeable about the deep sea	TRUE	Extremely sure	3	2	2	4	4	2	2	4	4	FALSE	Extremely sure	Economic reasons,Environmental reasons,Cultural reasons		Fisheries,Energy,Medicine,Minerals		Cold water coral & sponge reefs,Methane seeps,Hydrothermal vents,Seamounts,Canyons,Kelp Forest,Mud	Not sure	3	4	4	4	4	4	98661	77	Bachelor's degree
Baseline	3. Somewhat knowledgeable about the deep sea	TRUE	Somewhat sure	1	1	1	5	5	5	5	5	5	FALSE	Extremely sure	Economic reasons,Environmental reasons,Cultural reasons,Other	The future of the human race may be tied to the health of the ocean and the deep sea I'd part of the ocean.	Fisheries,Energy,Medicine,Minerals,Other	Technology	Methane seeps,Hydrothermal vents,Seamounts,Canyons,Mud	Somewhat sure	5	5	5	5	5	5	98661	76	Bachelor's degree
Baseline	2. Not very knowledgeable about the deep sea	TRUE	Extremely sure	1	1	1	5	5	5	5	4	2	FALSE	Extremely sure	Economic reasons,Environmental reasons		Fisheries,Medicine,Minerals		Cold water coral & sponge reefs,Methane seeps,Hydrothermal vents,Seamounts,Canyons,Mud	Somewhat sure	4	4	4	4	5	5	94044	26	Bachelor's degree
Baseline	3. Somewhat knowledgeable about the deep sea	TRUE	Extremely sure	1	1	1	5	5	5	5	5	5	FALSE	Extremely sure	Environmental reasons		Fisheries,Energy,Medicine,Minerals		Cold water coral & sponge reefs,Canyons,Mud	Somewhat sure	5	5	5	5	5	5	97394	70	Master's degree
Baseline	3. Somewhat knowledgeable about the deep sea	TRUE	Somewhat sure	1	1	1	5	5	5	5	5	5	FALSE	Extremely sure	Environmental reasons		Fisheries,Energy,Medicine,Minerals,Other	Protects climatological/oceanographic functionality for the ocean and the earth	Methane seeps,Hydrothermal vents,Seamounts,Canyons	Somewhat sure	4	4	4	2	5	5	97015	50	Bachelor's degree
Baseline	3. Somewhat knowledgeable about the deep sea	TRUE	Somewhat sure	2	1	1	5	5	5	3	4	3	FALSE	Extremely sure	Economic reasons,Environmental reasons		Fisheries,Minerals		Methane seeps,Hydrothermal vents,Seamounts,Canyons	Somewhat sure	4	4	4	4	4	4	97209	79	Master's degree
Baseline	2. Not very knowledgeable about the deep sea	TRUE	Somewhat sure	2	1	1	5	5	4	4	4	4	FALSE	Extremely sure	Economic reasons,Environmental reasons,Cultural reasons		Fisheries,Energy,Medicine		Hydrothermal vents,Canyons,Kelp Forest,Mud	Somewhat sure	4	4	3	4	5	5	97031	43	Bachelor's degree
Baseline	3. Somewhat knowledgeable about the deep sea	TRUE	Extremely sure	1	1	1	5	5	5	4	5	5	FALSE	Extremely sure	Economic reasons,Environmental reasons,Cultural reasons		Fisheries,Medicine,Minerals,Other	Knowledge	Cold water coral & sponge reefs,Methane seeps,Hydrothermal vents,Seamounts,Canyons,Mud		5	5	4	3	5	5	97219	73	Master's degree
Baseline	3. Somewhat knowledgeable about the deep sea	TRUE	Somewhat sure	1	1	3	5	5	5	5	5	5	FALSE	Somewhat sure	Economic reasons,Environmental reasons,Cultural reasons		Fisheries,Energy,Medicine,Minerals		Cold water coral & sponge reefs,Hydrothermal vents,Seamounts,Canyons,Kelp Forest	Somewhat sure							98683	68	Some college credit, no degree
Baseline	2. Not very knowledgeable about the deep sea	TRUE	Extremely sure	1	1	1	5	4	4	5	5	4	FALSE	Extremely sure	Economic reasons,Environmental reasons		Fisheries,Energy,Medicine,Minerals		Cold water coral & sponge reefs,Methane seeps,Hydrothermal vents,Seamounts,Canyons,Kelp Forest,Mud	Extremely sure	5	5	5	4	5	5	97365	75	Bachelor's degree
Baseline	2. Not very knowledgeable about the deep sea	TRUE	Extremely sure	3	3	3	4	2	3	1	5	3	FALSE	Extremely sure	Economic reasons,Environmental reasons		Fisheries,Energy,Medicine		Methane seeps,Hydrothermal vents,Seamounts,Canyons,Kelp Forest	Extremely sure	4	4	4	4	4	4	97351	68	Bachelor's degree
Baseline	2. Not very knowledgeable about the deep sea	TRUE	Somewhat sure	4	2	3	3	2	2	2	4	4	FALSE	Extremely sure	Economic reasons,Environmental reasons		Fisheries,Energy,Medicine,Minerals		Cold water coral & sponge reefs,Methane seeps,Hydrothermal vents,Seamounts,Canyons,Kelp Forest	Somewhat sure	3	4	4	4	4	4	97351	68	Some college credit, no degree
Baseline	2. Not very knowledgeable about the deep sea	FALSE	Somewhat sure	1	1	3	4	4	4	2	3	3	FALSE	Extremely sure	Economic reasons,Environmental reasons,Cultural reasons		Energy,Medicine,Minerals		Methane seeps,Seamounts,Canyons,Kelp Forest,Mud	Not sure	4	4	4	4	4	4	98125	27	Bachelor's degree
Baseline	2. Not very knowledgeable about the deep sea	TRUE	Not sure	1	2	2	4	4	5	3	4	3	FALSE	Extremely sure	Environmental reasons		Medicine,Minerals		Hydrothermal vents,Kelp Forest,Mud	Not sure	3	5	5	3	5	5	98155	33	Associates degree
2A	3. Somewhat knowledgeable about the deep sea	FALSE	Not sure	1	1	1	5	4	4	3	2	4	FALSE	Extremely sure	Economic reasons,Environmental reasons,Cultural reasons		Fisheries,Energy,Medicine,Minerals		Cold water coral & sponge reefs,Methane seeps,Hydrothermal vents,Seamounts,Canyons,Kelp Forest,Mud	Somewhat sure	4	4	4	4	4	4	97305	32	High school graduate, diploma or the equivalent (for example: GED)
2A	1. Not at all knowledgeable about the deep sea	TRUE	Extremely sure	5	1	1	5	5	1	5	5	5	FALSE	Extremely sure	Environmental reasons		Fisheries,Energy,Medicine,Minerals		Methane seeps,Canyons,Mud	Extremely sure	5	5	5	5			97306	72	Bachelor's degree
2A	3. Somewhat knowledgeable about the deep sea	TRUE	Extremely sure	4	2	3	5	4	3	4	5	5	FALSE	Extremely sure	Economic reasons,Environmental reasons,Cultural reasons		Fisheries,Energy,Medicine,Minerals		Cold water coral & sponge reefs,Methane seeps,Hydrothermal vents,Seamounts,Canyons,Mud	Extremely sure	5	5	5	4	4	5	97470	22	Some college credit, no degree
2A	3. Somewhat knowledgeable about the deep sea	TRUE	Extremely sure	2	1	1	5	5	5	3	5	4	FALSE	Extremely sure	Economic reasons,Environmental reasons,Cultural reasons		Fisheries,Energy,Medicine,Minerals		Cold water coral & sponge reefs,Methane seeps,Hydrothermal vents,Seamounts,Canyons	Extremely sure	4	4	4	4	5	5	97391	31	Some college credit, no degree
2A	3. Somewhat knowledgeable about the deep sea	TRUE	Extremely sure	2	2	2	4	4	3	3	4	4	FALSE	Extremely sure	Economic reasons,Environmental reasons,Other	health - medicinal	Fisheries,Energy,Medicine,Minerals		Methane seeps,Hydrothermal vents,Seamounts,Canyons,Kelp Forest	Somewhat sure	4	4	4	4	4	4	97222	70	Bachelor's degree
2A	3. Somewhat knowledgeable about the deep sea	TRUE	Somewhat sure	4	2	3	5	3	4	4	4	4	FALSE	Extremely sure			Fisheries,Energy,Medicine,Minerals		Methane seeps,Hydrothermal vents,Canyons	Somewhat sure	4	4	4	4	4	4	96052	65	Some college credit, no degree
2A	3. Somewhat knowledgeable about the deep sea	TRUE	Extremely sure	3	2	2	4	4	3	2	4	4	FALSE	Extremely sure	Economic reasons,Environmental reasons,Cultural reasons		Fisheries,Energy,Medicine,Minerals		Cold water coral & sponge reefs,Methane seeps,Hydrothermal vents,Seamounts,Canyons,Mud	Somewhat sure	4	4	3	3	4	4	97303	66	Master's degree
2A	2. Not very knowledgeable about the deep sea	TRUE	Extremely sure	3	1	2	5	2	1	1	1	3	FALSE	Extremely sure	Economic reasons,Environmental reasons,Cultural reasons				Cold water coral & sponge reefs,Methane seeps,Hydrothermal vents,Canyons,Kelp Forest,Mud	Extremely sure	5	4	4	4	4	5		83	Master's degree
2A	3. Somewhat knowledgeable about the deep sea	TRUE	Somewhat sure	2	2	1	5	4	4	3	5	5	FALSE	Extremely sure	Economic reasons,Environmental reasons,Cultural reasons		Fisheries,Energy,Medicine		Methane seeps,Hydrothermal vents,Canyons,Mud	Somewhat sure	4	4	4	3	4	4	98662	75	Bachelor's degree
2A	2. Not very knowledgeable about the deep sea	TRUE	Somewhat sure	3	1	1	5	5	3	3	5	5	FALSE	Extremely sure	Economic reasons,Environmental reasons		Fisheries,Energy,Medicine,Minerals		Methane seeps,Hydrothermal vents,Canyons,Mud	Somewhat sure	4	2					97703	40	Professional degree
2A	3. Somewhat knowledgeable about the deep sea	TRUE	Extremely sure	2	1	2	5	5	5	3	5	4	FALSE	Extremely sure	Economic reasons,Environmental reasons,Cultural reasons		Fisheries		Cold water coral & sponge reefs,Methane seeps,Hydrothermal vents,Mud	Somewhat sure	4	4	4	4	5	5	95403	59	Bachelor's degree
2A	2. Not very knowledgeable about the deep sea	TRUE	Extremely sure	3	3	3	1	3	2	1	5	5	FALSE	Extremely sure	Economic reasons,Environmental reasons		Fisheries,Energy,Medicine,Minerals		Cold water coral & sponge reefs,Methane seeps,Hydrothermal vents,Canyons,Kelp Forest,Mud	Somewhat sure	5	5	5	5	5	5	97365	70	Bachelor's degree
2A	2. Not very knowledgeable about the deep sea	TRUE	Extremely sure	2	2	3	4	4	4	4	4	4	FALSE	Extremely sure	Economic reasons,Environmental reasons		Fisheries,Energy		Cold water coral & sponge reefs,Methane seeps,Hydrothermal vents	Extremely sure	3	4	4	4	4	4	97232	47	Professional degree
2A	2. Not very knowledgeable about the deep sea	TRUE	Somewhat sure	3	2	3	4	3	4	3	3	3	FALSE	Somewhat sure	Environmental reasons		Energy,Medicine,Minerals		Cold water coral & sponge reefs,Methane seeps,Hydrothermal vents,Mud	Somewhat sure	3								Some college credit, no degree
2A	2. Not very knowledgeable about the deep sea	TRUE	Somewhat sure	2	1	1	5	4	5	5	3	4	FALSE	Extremely sure	Environmental reasons		Fisheries,Energy,Medicine,Minerals		Methane seeps,Hydrothermal vents,Canyons	Somewhat sure	4	4	4	4	4	4	97524	70	Some college credit, no degree
2A	1. Not at all knowledgeable about the deep sea	TRUE	Not sure	1	1	1	5	5	5	3	4	5	FALSE	Extremely sure	Environmental reasons		Energy,Medicine		Methane seeps,Hydrothermal vents,Canyons,Mud	Somewhat sure	5	5	3	2	5	5	59102	63	Some college credit, no degree
2B	4. Very knowledgeable about the deep sea	FALSE	Not sure	2	2	2	4	4	4	3	4	3	FALSE	Extremely sure			Fisheries,Energy		Methane seeps,Hydrothermal vents,Canyons,Mud	Not sure	4	4	4	4	4	4	59102	62	Doctorate degree
2B	3. Somewhat knowledgeable about the deep sea	TRUE	Somewhat sure	3	2	2	5	4	4	3	4	4	FALSE	Extremely sure	Economic reasons,Environmental reasons,Cultural reasons		Fisheries,Energy,Medicine,Minerals		Cold water coral & sponge reefs,Methane seeps,Hydrothermal vents,Seamounts,Kelp Forest	Somewhat sure	4	4	4	4	4	4	97230	59	Bachelor's degree
2B	2. Not very knowledgeable about the deep sea	TRUE	Extremely sure	4	2	2	5	5	4	1	5	4	FALSE	Extremely sure	Economic reasons,Environmental reasons,Cultural reasons		Fisheries,Energy,Medicine,Minerals		Cold water coral & sponge reefs,Methane seeps,Hydrothermal vents,Seamounts,Canyons,Mud	Somewhat sure	4	4	4	3	4	4	97128	23	Some college credit, no degree
2B	1. Not at all knowledgeable about the deep sea	TRUE	Somewhat sure	2	1	1	5	5	5	5	5	5	FALSE	Somewhat sure	Environmental reasons		Energy		Mud	Somewhat sure	5	5	3	3	3	3		25	Some college credit, no degree
2B	3. Somewhat knowledgeable about the deep sea	TRUE	Extremely sure	1	1	1	5	5	5	5	5	5	FALSE	Extremely sure	Environmental reasons		Fisheries,Energy,Medicine,Minerals		Cold water coral & sponge reefs,Methane seeps,Hydrothermal vents,Seamounts,Canyons,Mud	Extremely sure	4	5	3	3	5	5	97203	37	Master's degree
2B	3. Somewhat knowledgeable about the deep sea	TRUE	Extremely sure	3	4	1	1	4	2	4	4	4	FALSE	Extremely sure	Environmental reasons		Fisheries		Cold water coral & sponge reefs,Hydrothermal vents,Seamounts,Canyons,Mud	Somewhat sure	4	4	4	4	4	5	97470	40	Bachelor's degree
2B	2. Not very knowledgeable about the deep sea	FALSE	Not sure	1	1	1	5	4	4	4	3	4	FALSE	Extremely sure	Economic reasons,Environmental reasons,Cultural reasons		Energy,Medicine,Minerals		Methane seeps,Hydrothermal vents,Seamounts,Canyons	Somewhat sure	4	4	3	3	4	4	97498	57	Bachelor's degree
2B	3. Somewhat knowledgeable about the deep sea	FALSE	Somewhat sure	3	2	1	5	5	5	3	4	4	FALSE	Extremely sure	Environmental reasons		Fisheries,Energy,Medicine,Minerals		Cold water coral & sponge reefs,Methane seeps,Hydrothermal vents,Canyons,Mud	Extremely sure	5	3	4	3	4	4	97703
2B	3. Somewhat knowledgeable about the deep sea	TRUE	Somewhat sure	2	2	2	5	4	3	3	4	3	FALSE	Somewhat sure	Economic reasons,Environmental reasons,Cultural reasons		Fisheries,Energy,Medicine		Cold water coral & sponge reefs,Methane seeps,Hydrothermal vents,Seamounts,Canyons,Mud	Somewhat sure	3	4	4	4	3	3	95618	54	Master's degree
2B	3. Somewhat knowledgeable about the deep sea	TRUE	Extremely sure	3	3	3	5	4	4	3	4	4	FALSE	Extremely sure	Economic reasons,Environmental reasons		Fisheries,Energy,Medicine,Minerals		Cold water coral & sponge reefs,Methane seeps,Hydrothermal vents,Seamounts,Canyons,Mud	Extremely sure	5	4	4	4	4	4	11756	53	Associates degree
2B	2. Not very knowledgeable about the deep sea	TRUE	Extremely sure	1	1	1	5	5	5	5	5	4	FALSE	Extremely sure	Economic reasons,Environmental reasons		Fisheries,Minerals		Cold water coral & sponge reefs,Methane seeps,Hydrothermal vents,Seamounts,Canyons,Mud	Extremely sure	5	5	5	4	5	5	98053	20	Some college credit, no degree
2B	3. Somewhat knowledgeable about the deep sea	TRUE	Extremely sure	4	1	2	4	4	4	4	5	5	FALSE	Extremely sure	Economic reasons,Environmental reasons,Cultural reasons		Fisheries,Energy,Medicine,Minerals		Methane seeps,Hydrothermal vents,Seamounts,Canyons,Mud	Extremely sure	4	4	4	4	4	4	96785	20	Some college credit, no degree
2B	1. Not at all knowledgeable about the deep sea	TRUE	Extremely sure				4				4	4	FALSE	Extremely sure	Economic reasons,Environmental reasons,Cultural reasons		Fisheries,Energy,Medicine,Minerals		Methane seeps,Seamounts,Canyons,Mud	Extremely sure	4	4	4	4	4	4	97365		Master's degree
2B	3. Somewhat knowledgeable about the deep sea	TRUE	Somewhat sure	1	1	1	5	5	5	5	5	5	FALSE	Extremely sure	Environmental reasons,Cultural reasons		Fisheries,Energy,Medicine		Seamounts,Canyons	Somewhat sure	5	5	5	4	5	5	97321	49	Associates degree
2C	2. Not very knowledgeable about the deep sea	TRUE	Extremely sure	2	1	2	5	5		5	4	3	FALSE	Extremely sure	Environmental reasons		Fisheries,Energy,Medicine,Minerals		Cold water coral & sponge reefs,Methane seeps,Hydrothermal vents,Seamounts,Canyons,Mud	Extremely sure	5	5	2	2	5	5	97233	61	Associates degree
2C	2. Not very knowledgeable about the deep sea	TRUE	Extremely sure	4	2	2	5	4	3	4	5	4	FALSE	Extremely sure	Economic reasons,Environmental reasons		Fisheries,Energy,Medicine,Minerals		Cold water coral & sponge reefs,Methane seeps,Hydrothermal vents,Seamounts,Canyons,Kelp Forest,Mud	Not sure	4	4	4	4	4	5	53150	59	Bachelor's degree
2C	2. Not very knowledgeable about the deep sea	TRUE	Somewhat sure	4	4	2	4	4	3	3	4	4	FALSE	Extremely sure	Economic reasons,Environmental reasons,Cultural reasons		Fisheries,Energy,Medicine,Minerals		Cold water coral & sponge reefs,Methane seeps,Hydrothermal vents,Canyons,Mud	Extremely sure	4	4	4	4	4	4	60018	62	Associates degree
2C	3. Somewhat knowledgeable about the deep sea	TRUE	Extremely sure	2	2	4	5	3	3	3	4	4	FALSE	Extremely sure	Economic reasons,Environmental reasons,Cultural reasons		Fisheries,Energy,Minerals		Cold water coral & sponge reefs,Methane seeps,Hydrothermal vents,Seamounts,Canyons	Extremely sure	4	3	4	3	3	3	97471	29	Associates degree
2C	3. Somewhat knowledgeable about the deep sea	TRUE	Extremely sure	2	1	1	5	5	4	4	5	5	FALSE	Extremely sure	Economic reasons,Environmental reasons,Cultural reasons		Fisheries,Energy,Medicine,Minerals		Cold water coral & sponge reefs,Methane seeps,Hydrothermal vents,Seamounts,Canyons,Mud	Extremely sure	5	5	4	4	5	5	97478	64	Master's degree
2C	3. Somewhat knowledgeable about the deep sea	TRUE	Extremely sure	2	1	1	5	5	5	5	5	5	FALSE	Extremely sure	Economic reasons,Environmental reasons,Cultural reasons,Other	Life	Fisheries,Energy,Medicine,Minerals		Cold water coral & sponge reefs,Hydrothermal vents,Seamounts,Mud	Somewhat sure	5	5	5	4	5	5	97430	31	Some college credit, no degree
2C	1. Not at all knowledgeable about the deep sea	TRUE	Extremely sure	1	1	1	5	5	5	3	4	4	FALSE	Extremely sure	Economic reasons,Environmental reasons,Cultural reasons		Fisheries,Energy,Medicine,Minerals,Other	Spiritual	Cold water coral & sponge reefs,Methane seeps,Canyons,Kelp Forest,Mud	Extremely sure	3	3	3	3	4	4	97113	56	Bachelor's degree
